# Supplementary material
Source: PubMed Central journal article supplement (PMC2752322)
Supplement: NIHMS134240-supplement-01.pdf [file NIHMS134240-supplement-01.pdf]

| Log <sub>2</sub> fold ch. | Gene Symbol | Gene Title                                                                             | UniGene ID | RefSeq Transcript ID |
|---------------------------|-------------|----------------------------------------------------------------------------------------|------------|----------------------|
| 2.616430767               | DKK1        | dickkopf homolog 1 ( <i>Xenopus laevis</i> )                                           | 40499      | NM_012242            |
| 1.793046433               | TM4SF1      | transmembrane 4 L six family member 1                                                  | 715499     | NM_014220            |
| 1.726048367               | IL8         | interleukin 8                                                                          | 551925     | NM_000584            |
| 1.6543098                 | TAGLN       | transgelin                                                                             | 410977     | NM_001001522         |
| 1.596934733               | TM4SF1      | transmembrane 4 L six family member 1                                                  | 715499     | NM_014220            |
| 1.562056667               | TM4SF1      | transmembrane 4 L six family member 1                                                  | 715499     | NM_014220            |
| 1.463482333               | PHLDA1      | pleckstrin homology-like domain, family A, member 1                                    | 602085     | NM_007350            |
| 1.460684567               | IL8         | interleukin 8                                                                          | 551925     | NM_000584            |
| 1.423042367               | PHLDA1      | pleckstrin homology-like domain, family A, member 1                                    | 602085     | NM_007350            |
| 1.403744733               | PTGS2       | prostaglandin-endoperoxide synthase 2 (prostaglandin G/H synthase and cyclooxy         | 196384     | NM_000963            |
| 1.2589958                 | NAV3        | neuron navigator 3                                                                     | 655301     | NM_014903            |
| 1.159707833               | TNFRSF12A   | tumor necrosis factor receptor superfamily, member 12A                                 | 355899     | NM_016639            |
| 1.109464233               | PHLDA1      | pleckstrin homology-like domain, family A, member 1                                    | 602085     | NM_007350            |
| 1.0739392                 | ARL14       | ADP-ribosylation factor-like 14                                                        | 287702     | NM_025047            |
| 0.990225967               | FOSL1       | FOS-like antigen 1                                                                     | 283565     | NM_005438            |
| 0.983454333               | GPRC5A      | G protein-coupled receptor, family C, group 5, member A                                | 631733     | NM_003979            |
| 0.9372                    | F2RL1       | coagulation factor II (thrombin) receptor-like 1                                       | 154299     | NM_005242            |
| 0.920040433               | GJB3        | gap junction protein, beta 3, 31kDa                                                    | 522561     | NM_001005752         |
| 0.9060785                 | PHLDA1      | pleckstrin homology-like domain, family A, member 1                                    | 602085     | NM_007350            |
| 0.893226033               | ZYX         | zyxin                                                                                  | 490415     | NM_001010972         |
| 0.885576333               | SERPINE1    | serpin peptidase inhibitor, clade E (nexin, plasminogen activator inhibitor type 1), m | 414795     | NM_000602            |
| 0.871147333               | CCL5        | chemokine (C-C motif) ligand 5                                                         | 514821     | NM_002985            |
| 0.852539633               | ZYX         | zyxin                                                                                  | 490415     | NM_001010972         |
| 0.843017533               | SERPINB8    | serpin peptidase inhibitor, clade B (ovalbumin), member 8                              | 368077     | NM_001031848         |
| 0.843004833               | EGFR        | epidermal growth factor receptor (erythroblastic leukemia viral (v-erb-b) oncogene     | 488293     | NM_005228            |
| 0.832596933               | GJB3        | gap junction protein, beta 3, 31kDa                                                    | 522561     | NM_001005752         |
| 0.821409667               | FHL2        | four and a half LIM domains 2                                                          | 443687     | NM_001039492         |
| 0.821202633               | TGFB2       | transforming growth factor, beta 2                                                     | 133379     | NM_001135599         |
| 0.815754967               | GULP1       | GULP, engulfment adaptor PTB domain containing 1                                       | 470887     | NM_016315            |
| 0.814864                  | SERPINE1    | serpin peptidase inhibitor, clade E (nexin, plasminogen activator inhibitor type 1), m | 414795     | NM_000602            |
| 0.810420433               | BIRC3       | baculoviral IAP repeat-containing 3                                                    | 127799     | NM_001165            |
| 0.799149433               | TNFAIP3     | tumor necrosis factor, alpha-induced protein 3                                         | 211600     | NM_006290            |
| 0.788044033               | CCL5        | chemokine (C-C motif) ligand 5                                                         | 514821     | NM_002985            |
| 0.776419867               | DUSP4       | dual specificity phosphatase 4                                                         | 417962     | NM_001394            |
| 0.772543067               | PLAUR       | plasminogen activator, urokinase receptor                                              | 466871     | NM_001005376         |
| 0.7641242                 | PLAUR       | plasminogen activator, urokinase receptor                                              | 466871     | NM_001005376         |
| 0.762616667               | ---         | ---                                                                                    | 632997     | ---                  |
| 0.75134                   | F2RL1       | coagulation factor II (thrombin) receptor-like 1                                       | 154299     | NM_005242            |
| 0.7375928                 | CYP26B1     | cytochrome P450, family 26, subfamily B, polypeptide 1                                 | 91546      | NM_019885            |
| 0.729504233               | UPP1        | uridine phosphorylase 1                                                                | 488240     | NM_003364            |
| 0.717916267               | C3orf52     | chromosome 3 open reading frame 52                                                     | 434247     | NM_024616            |

|             |               |                                                                                       |        |              |
|-------------|---------------|---------------------------------------------------------------------------------------|--------|--------------|
| 0.714605367 | MAFF          | v-maf musculoaponeurotic fibrosarcoma oncogene homolog F (avian)                      | 517617 | NM_012323    |
| 0.6995297   | TNFAIP3       | tumor necrosis factor, alpha-induced protein 3                                        | 211600 | NM_006290    |
| 0.6910975   | TFAP2A        | transcription factor AP-2 alpha (activating enhancer binding protein 2 alpha)         | 519880 | NM_001032280 |
| 0.6685788   | ARAP2         | ArfGAP with RhoGAP domain, ankyrin repeat and PH domain 2                             | 479451 | NM_015230    |
| 0.667982967 | LOC652993 /// | hypothetical LOC652993 ///<br>pleckstrin homology-like domain, family A, member 1     | 585591 | NM_007350    |
| 0.661431733 | LGALS8        | lectin, galactoside-binding, soluble, 8                                               | 4082   | NM_006499    |
| 0.637047333 | INPP1         | inositol polyphosphate-1-phosphatase                                                  | 32309  | NM_001128928 |
| 0.630621733 | EGFR          | epidermal growth factor receptor (erythroblastic leukemia viral (v-erb-b) oncogene    | 488293 | NM_005228    |
| 0.621319633 | PDE2A         | phosphodiesterase 2A, cGMP-stimulated                                                 | 503163 | NM_001143839 |
| 0.6175209   | EGFR          | epidermal growth factor receptor (erythroblastic leukemia viral (v-erb-b) oncogene    | 488293 | NM_005228    |
| 0.613930067 | ADAM19        | ADAM metallopeptidase domain 19 (meltrin beta)                                        | 483944 | NM_023038    |
| 0.613492867 | SSTR1         | somatostatin receptor 1                                                               | 248160 | NM_001049    |
| 0.5759212   | EMP1          | epithelial membrane protein 1                                                         | 713606 | NM_001423    |
| 0.558196233 | GABPB1        | GA binding protein transcription factor, beta subunit 1                               | 654350 | NM_002041    |
| 0.546268867 | SEC24D        | SEC24 family, member D (S. cerevisiae)                                                | 189641 | NM_014822    |
| 0.5407139   | SHB           | Src homology 2 domain containing adaptor protein B                                    | 521482 | NM_003028    |
| 0.536252433 | SPAG1         | sperm associated antigen 1                                                            | 591866 | NM_003114    |
| 0.524134467 | HRH1          | histamine receptor H1                                                                 | 1570   | NM_000861    |
| 0.507825333 | PMM2          | phosphomannomutase 2                                                                  | 713724 | NM_000303    |
| 0.505585533 | NFKBIE        | nuclear factor of kappa light polypeptide gene enhancer in B-cells inhibitor, epsilon | 458276 | NM_004556    |
| 0.50327     | ---           | ---                                                                                   | ---    | ---          |
| 0.5020566   | PSME3         | proteasome (prosome, macropain) activator subunit 3 (PA28 gamma; Ki)                  | 152978 | NM_005789    |
| 0.500677733 | P2RX2         | purinergic receptor P2X, ligand-gated ion channel, 2                                  | 258580 | NM_012226    |
| 0.4955685   | SIM2          | single-minded homolog 2 (Drosophila)                                                  | 146186 | NM_005069    |
| 0.473429533 | ABHD9         | abhydrolase domain containing 9                                                       | 156457 | NM_001142886 |
| 0.454180833 | TNS4          | tensin 4                                                                              | 438292 | NM_032865    |
| 0.4420404   | SHB           | Src homology 2 domain containing adaptor protein B                                    | 521482 | NM_003028    |
| 0.435222867 | LRP12         | low density lipoprotein-related protein 12                                            | 600630 | NM_001135703 |
| 0.422802333 | BYSL          | bystin-like                                                                           | 106880 | NM_004053    |
| 0.4184054   | SALL2         | sal-like 2 (Drosophila)                                                               | 716595 | NM_005407    |
| 0.4156625   | RBP1          | retinol binding protein 1, cellular                                                   | 529571 | NM_001130992 |
| 0.389840233 | JMJD6         | jumonji domain containing 6                                                           | 514505 | NM_001081461 |
| -0.36273153 | TM7SF3        | transmembrane 7 superfamily member 3                                                  | 438641 | NM_016551    |
| -0.3770653  | TRA2A         | transformer-2 alpha                                                                   | 445652 | NM_013293    |
| -0.4085411  | ZMAT3         | zinc finger, matrin type 3                                                            | 386299 | NM_022470    |
| -0.4355056  | FAM149B1      | family with sequence similarity 149, member B1                                        | 408577 | NM_173348    |
| -0.4400951  | WDR52         | WD repeat domain 52                                                                   | 584936 | NM_018338    |
| -0.44136867 | TAF6L         | TAF6-like RNA polymerase II, p300/CBP-associated factor (PCAF)-associated fact        | 714400 | NM_006473    |
| -0.460599   | UCP2          | uncoupling protein 2 (mitochondrial, proton carrier)                                  | 80658  | NM_003355    |
| -0.462359   | SLC7A7        | solute carrier family 7 (cationic amino acid transporter, y+ system), member 7        | 513147 | NM_001126105 |
| -0.46377887 | ---           | ---                                                                                   | 655754 | ---          |
| -0.487992   | MXI1          | MAX interactor 1                                                                      | 716483 | NM_001008541 |
| -0.50352927 | LOC400642     | Hypothetical gene supported by BC041875; BX648984, mRNA (cDNA clone IMAG              | 709279 | NR_015389    |

|             |                 |                                                                                               |        |              |
|-------------|-----------------|-----------------------------------------------------------------------------------------------|--------|--------------|
| -0.50527723 | C10orf10        | chromosome 10 open reading frame 10                                                           | 93675  | NM_007021    |
| -0.51506223 | PHLPP           | PH domain and leucine rich repeat protein phosphatase                                         | 465337 | NM_194449    |
| -0.51867873 | CTH             | cystathionase (cystathionine gamma-lyase)                                                     | 19904  | NM_001902    |
| -0.52806567 | TRIM23          | tripartite motif-containing 23                                                                | 792    | NM_001656    |
| -0.55052057 | HMGCL           | 3-hydroxymethyl-3-methylglutaryl-Coenzyme A lyase                                             | 533444 | NM_000191    |
| -0.56557883 | PAPOLG          | poly(A) polymerase gamma                                                                      | 387471 | NM_022894    |
| -0.57122667 | SEMA4G          | sema domain, immunoglobulin domain (Ig), transmembrane domain (TM) and short cytoplasmic tail | 591923 | NM_017893    |
| -0.57319053 | FAM49A          | family with sequence similarity 49, member A                                                  | 467769 | NM_030797    |
| -0.58667307 | ---             | ---                                                                                           | 657591 | ---          |
| -0.5959199  | CYP3A5          | cytochrome P450, family 3, subfamily A, polypeptide 5                                         | 695915 | NM_000777    |
| -0.5983422  | FGF18           | fibroblast growth factor 18                                                                   | 87191  | NM_003862    |
| -0.59911047 | GPR143          | G protein-coupled receptor 143                                                                | 74124  | NM_000273    |
| -0.60445703 | SMAD6           | SMAD family member 6                                                                          | 153863 | NM_001142861 |
| -0.61143467 | KLF2            | Kruppel-like factor 2 (lung)                                                                  | 715677 | NM_016270    |
| -0.61159377 | NOTCH3          | Notch homolog 3 (Drosophila)                                                                  | 8546   | NM_000435    |
| -0.612323   | SLC16A2         | solute carrier family 16, member 2 (monocarboxylic acid transporter 8)                        | 75317  | NM_006517    |
| -0.61438063 | PTCH1           | patched homolog 1 (Drosophila)                                                                | 494538 | NM_000264    |
| -0.62632727 | ANXA8 /// ANXA8 | annexin A8 /// annexin A8-like 1 /// annexin A8-like 2                                        | 705389 | NM_001040084 |
| -0.64669813 | SYNE2           | spectrin repeat containing, nuclear envelope 2                                                | 525392 | NM_015180    |
| -0.661785   | GLS             | glutaminase                                                                                   | 116448 | NM_014905    |
| -0.66579167 | BAMBI           | BMP and activin membrane-bound inhibitor homolog (Xenopus laevis)                             | 533336 | NM_012342    |
| -0.672397   | ARID5B          | AT rich interactive domain 5B (MRF1-like)                                                     | 535297 | NM_032199    |
| -0.67444117 | DUSP1           | dual specificity phosphatase 1                                                                | 171695 | NM_004417    |
| -0.67512567 | RECK            | reversion-inducing-cysteine-rich protein with kazal motifs                                    | 716452 | NM_021111    |
| -0.6956158  | RPL31           | ribosomal protein L31                                                                         | 469473 | NM_000993    |
| -0.69660977 | FGF18           | fibroblast growth factor 18                                                                   | 87191  | NM_003862    |
| -0.69798637 | C2orf24         | chromosome 2 open reading frame 24                                                            | 4973   | NM_015680    |
| -0.7078181  | HSD3B1          | hydroxy-delta-5-steroid dehydrogenase, 3 beta- and steroid delta-isomerase 1                  | 364941 | NM_000862    |
| -0.71721707 | ACOX1           | acyl-Coenzyme A oxidase 1, palmitoyl                                                          | 464137 | NM_004035    |
| -0.7310127  | ---             | ---                                                                                           | 633645 | ---          |
| -0.7431508  | RIN2            | Ras and Rab interactor 2                                                                      | 472270 | NM_018993    |
| -0.745677   | CD24            | CD24 molecule                                                                                 | 694721 | NM_013230    |
| -0.75480367 | JUN             | jun oncogene                                                                                  | 714791 | NM_002228    |
| -0.75800993 | PBX1            | pre-B-cell leukemia homeobox 1                                                                | 654412 | NM_002585    |
| -0.776454   | DUSP1           | dual specificity phosphatase 1                                                                | 171695 | NM_004417    |
| -0.8122878  | ---             | ---                                                                                           | 656945 | ---          |
| -0.81770183 | IER2            | immediate early response 2                                                                    | 501629 | NM_004907    |
| -0.835504   | ITPR2           | inositol 1,4,5-triphosphate receptor, type 2                                                  | 512235 | NM_002223    |
| -0.84321837 | BTN3A1          | butyrophilin, subfamily 3, member A1                                                          | 191510 | NM_007048    |
| -0.85512437 | CCNG2           | cyclin G2                                                                                     | 13291  | NM_004354    |
| -0.89168343 | UTRN            | utrophin                                                                                      | 133135 | NM_007124    |
| -0.90147997 | CDKN1C          | cyclin-dependent kinase inhibitor 1C (p57, Kip2)                                              | 106070 | NM_000076    |
| -0.9075803  | FAM13A1         | family with sequence similarity 13, member A1                                                 | 97270  | NM_001015045 |

|             |         |                                                                          |        |              |
|-------------|---------|--------------------------------------------------------------------------|--------|--------------|
| -0.91714293 | JUN     | jun oncogene                                                             | 714791 | NM_002228    |
| -1.0275672  | ---     | ---                                                                      | 663176 | ---          |
| -1.03463683 | ANXA9   | annexin A9                                                               | 3346   | NM_003568    |
| -1.06735933 | CLIC3   | chloride intracellular channel 3                                         | 64746  | NM_004669    |
| -1.0854672  | CDKN1C  | cyclin-dependent kinase inhibitor 1C (p57, Kip2)                         | 106070 | NM_000076    |
| -1.09311277 | KRT4    | keratin 4                                                                | 654610 | NM_002272    |
| -1.0972421  | ---     | ---                                                                      | 661665 | ---          |
| -1.146307   | ATP8A1  | ATPase, aminophospholipid transporter (APLT), class I, type 8A, member 1 | 435052 | NM_001105529 |
| -1.18464887 | PLSCR4  | phospholipid scramblase 4                                                | 477869 | NM_001128304 |
| -1.19521273 | PBX1    | pre-B-cell leukemia homeobox 1                                           | 654412 | NM_002585    |
| -1.2064105  | BTG2    | BTG family, member 2                                                     | 519162 | NM_006763    |
| -1.2591202  | TXNIP   | thioredoxin interacting protein                                          | 715525 | NM_006472    |
| -1.28392403 | METTL7A | methyltransferase like 7A                                                | 716437 | NM_014033    |
| -1.313946   | TXNIP   | thioredoxin interacting protein                                          | 715525 | NM_006472    |
| -1.3233789  | ATAD4   | ATPase family, AAA domain containing 4                                   | 368260 | NM_024320    |
| -1.33133203 | SORBS2  | sorbin and SH3 domain containing 2                                       | 655143 | NM_003603    |
| -1.3596049  | TXNIP   | thioredoxin interacting protein                                          | 715525 | NM_006472    |
| -1.5429018  | EGR2    | early growth response 2 (Krox-20 homolog, Drosophila)                    | 1395   | NM_000399    |
| -1.55356097 | FOSB    | FBJ murine osteosarcoma viral oncogene homolog B                         | 590958 | NM_001114171 |
| -1.87199367 | FOS     | v-fos FBJ murine osteosarcoma viral oncogene homolog                     | 25647  | NM_005252    |
